# Supplementary material for: Assessment of Dietary Intake of Iodine and Risk of Iodine Deficiency in Children with Classical Galactosaemia on Dietary Treatment
Source: MDPI journal article supplement (doi:10.3390/nu15020407), 2023-01-13
Supplement: s1 [file s1]

## Seafood

### Cod

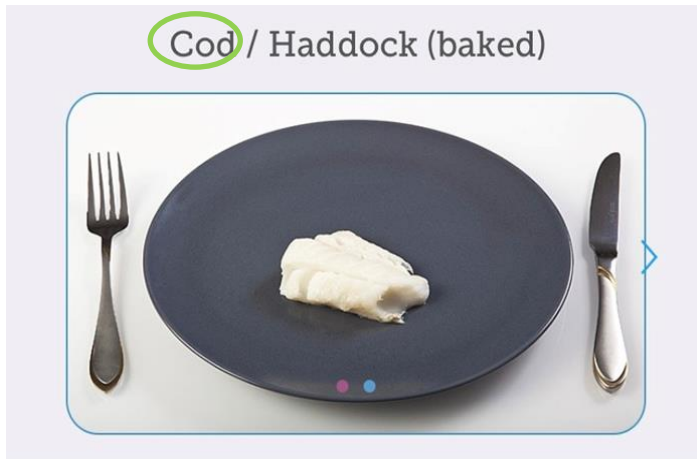

Weight

I = 96.6 µg

60g

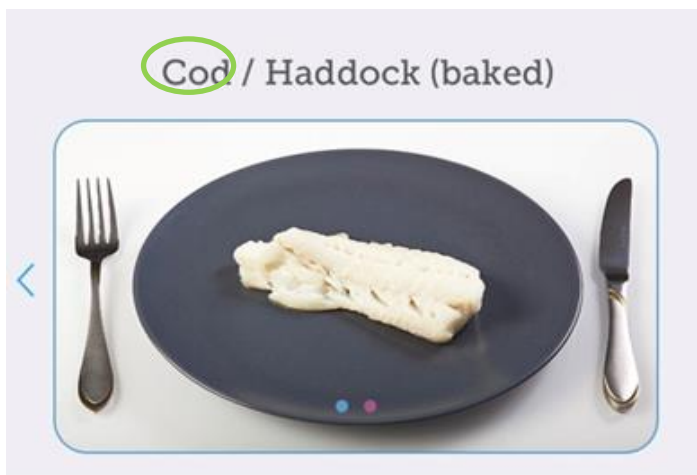

Weight

I = 201.25 µg

125g

| Cooking method, Cod                            | Iodine intake ug/100g | Iodine intake ug/60g | Iodine intake ug/125g |
|------------------------------------------------|-----------------------|----------------------|-----------------------|
| Cod <b>baked</b>                               | 161                   | 96.6                 | 201.25                |
| Cod, flesh only, <b>grilled</b>                | 276                   | 165.6                | 345                   |
| Cod, flesh only, <b>microwaved</b>             | 243                   | 145.8                | 303.75                |
| Cod, flesh only, <b>steamed</b>                | 256                   | 153.6                | 320                   |
| Cod, flesh only, <b>salted and smoked, raw</b> | 110                   | 66                   | 137.5                 |

## Breaded Fish (Donegal catch, supermarket bought)

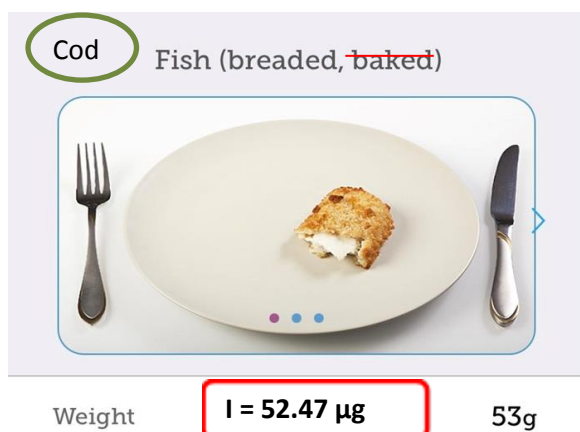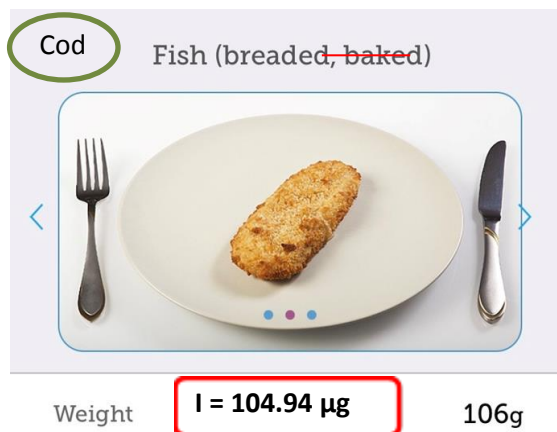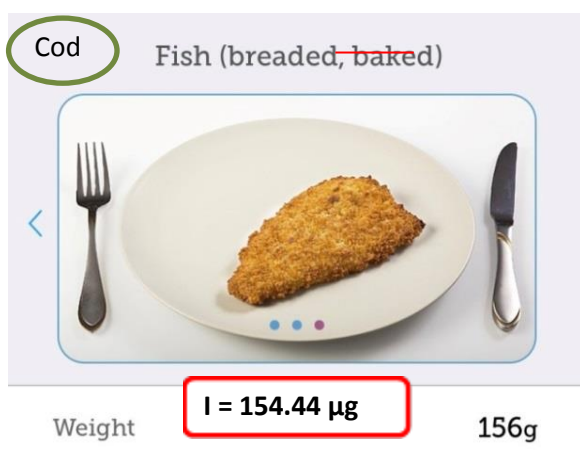

| Breaded fish                                                          | Iodine intake<br>ug/100g | Iodine intake<br>ug/53g | Iodine intake<br>ug/106g | Iodine intake<br>ug/156g |
|-----------------------------------------------------------------------|--------------------------|-------------------------|--------------------------|--------------------------|
| <b>Cod</b> , in<br>breadcrumbs,<br>baked                              | 99                       | 52.47                   | 104.94                   | 154.44                   |
| <b>Haddock</b> , coated in<br>crumbs, frozen,<br>fried in blended oil | 250                      | 132.5                   | 265                      | 390                      |
| <b>Plaice</b> in<br>breadcrumbs,<br>baked                             | 16                       | 8.48                    | 16.96                    | 24.96                    |
|                                                                       |                          |                         |                          |                          |
|                                                                       |                          |                         |                          |                          |

## Fish from the takeaway

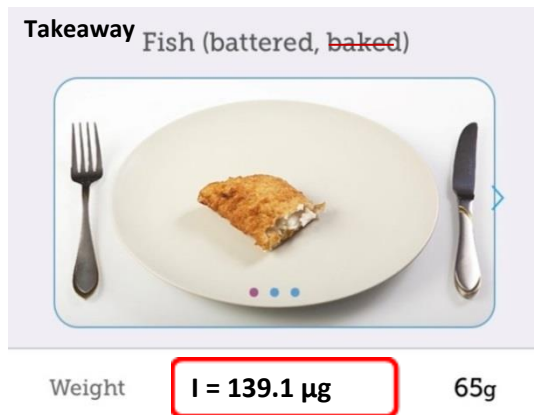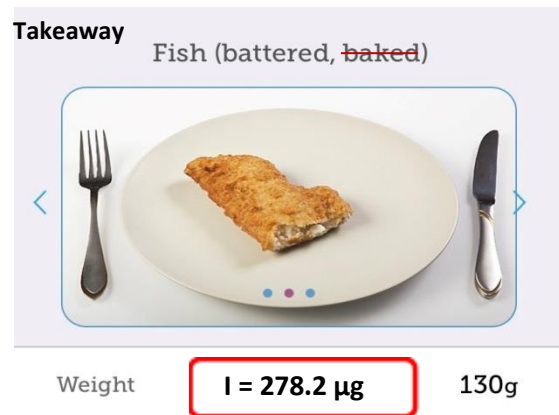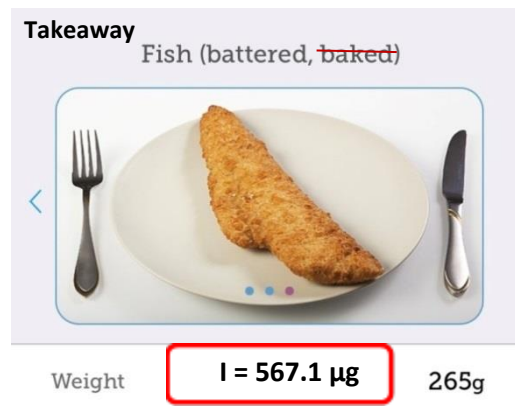

| Cod - takeaway                                                    | Iodine intake<br>ug/100g | Iodine intake<br>ug/65g | Iodine intake<br>ug/130g | Iodine intake<br>ug/265g |
|-------------------------------------------------------------------|--------------------------|-------------------------|--------------------------|--------------------------|
| Cod, in <b>batter</b> ,<br>fried in dripping,<br><b>takeaway</b>  | 214                      | 139.1                   | 278.2                    | 567.1                    |
| Plaice, in <b>batter</b> ,<br><b>fried</b> in retail blend<br>oil | 16                       | 10.4                    | 20.8                     | 42.4                     |

## Fish cakes/fingers

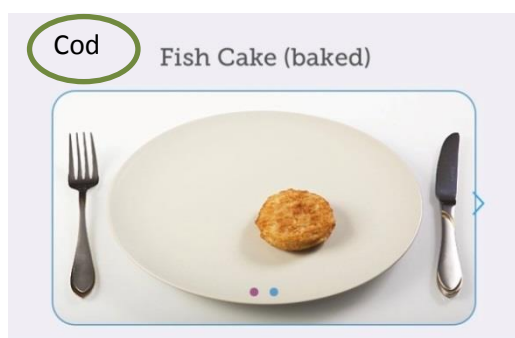

Weight

**I = 30.16 µg**

52g

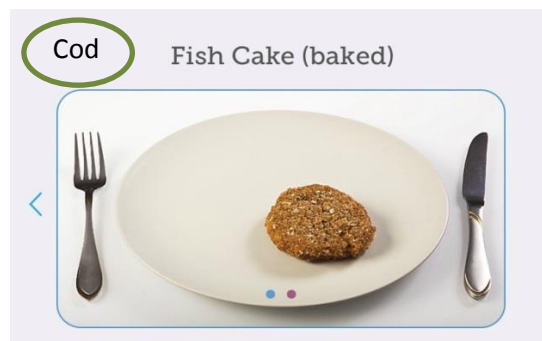

Weight

**I = 52.2 µg**

90g

| Fish cake                                                   | Iodine intake ug/100g | Iodine intake ug/52g | Iodine intake ug/90g |
|-------------------------------------------------------------|-----------------------|----------------------|----------------------|
| Fishcakes, <i>white fish</i> , coated in breadcrumbs, baked | 58                    | 30.16                | 52.2                 |
| Fishcakes, <i>salmon</i> , coated in breadcrumbs, baked     | 6                     | 3.12                 | 5.4                  |

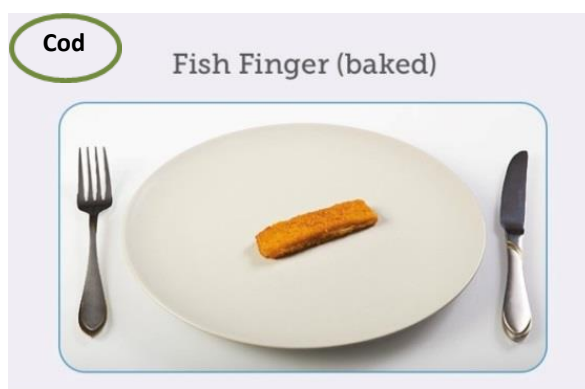

Weight

**I = 23.4 µg**

20g

| Fish finger                                             | Iodine intake ug/100g | Iodine intake ug/20g |
|---------------------------------------------------------|-----------------------|----------------------|
| Fish fingers, <i>cod</i> , <b>grilled/baked</b>         | 117                   | 23.4                 |
| Fish fingers, <i>cod</i> , <b>fried in rapeseed oil</b> | 106                   | 21.2                 |
| Fish fingers, <i>pollock</i> , <b>grilled</b>           | 47                    | 9.4                  |
| Fish fingers, <i>salmon</i> , <b>grilled/baked</b>      | 6                     | 1.2                  |

## Haddock/Pollock

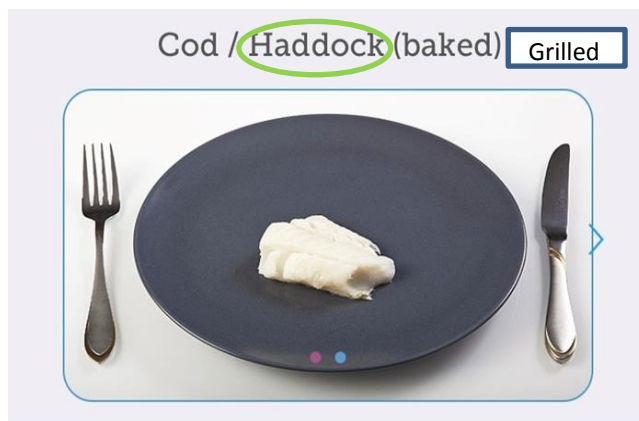

Weight

I = 252.6 µg

60g

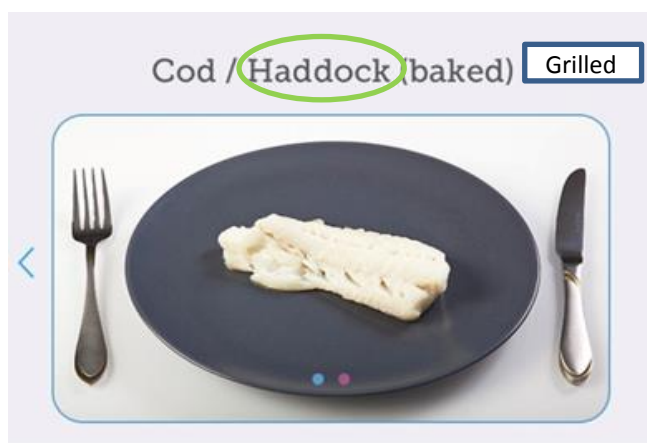

Weight

I = 526.25 µg

125g

| Cooking method, Cod                         | Iodine intake ug/100g | Iodine intake ug/60g | Iodine intake ug/125g |
|---------------------------------------------|-----------------------|----------------------|-----------------------|
| Haddock, flesh only, <b>grilled</b>         | 421                   | 252.6                | 526.25                |
| Haddock, flesh only, <b>poached</b>         | 409                   | 245.4                | 511.25                |
| Haddock, flesh only, <b>steamed</b>         | 381                   | 228.6                | 476.25                |
| Haddock, flesh only, <b>smoked, steamed</b> | 257                   | 154.2                | 321.25                |

## Plaice

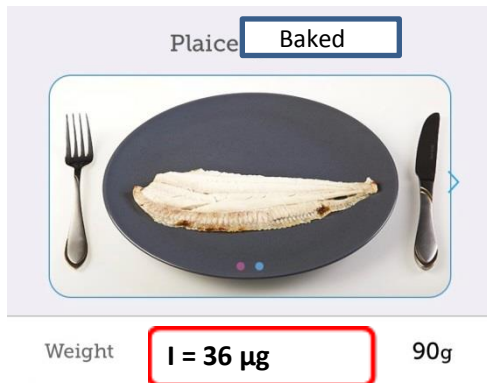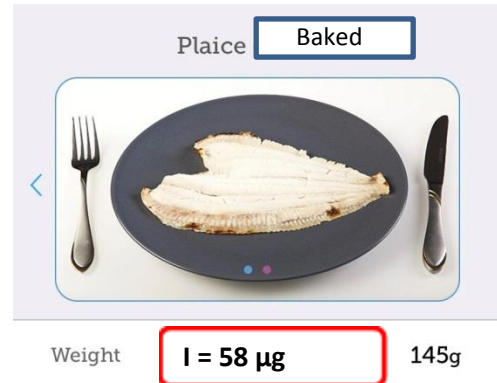

| Cooking method,<br>Plaice             | Iodine intake ug/100g | Iodine intake ug/90g | Iodine intake ug/145g |
|---------------------------------------|-----------------------|----------------------|-----------------------|
| Plaice, flesh only,<br><b>baked</b>   | 40                    | 36                   | 58                    |
| Plaice, flesh only,<br><b>steamed</b> | 37                    | 33.3                 | 53.65                 |

## Salmon

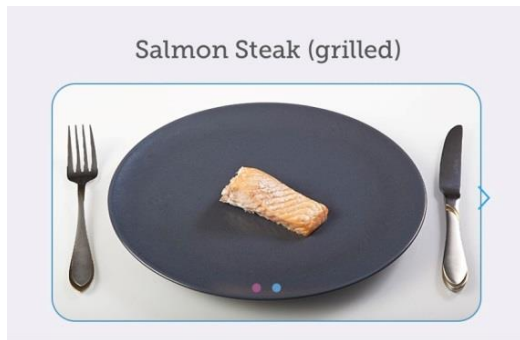

Weight **I = 8.4 µg** 60g

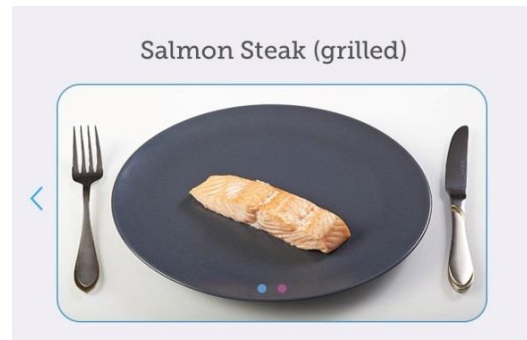

Weight **I = 18.2 µg** 130g

| Cooking method, Salmon                                           | Iodine intake ug/100g | Iodine intake ug/60g | Iodine intake ug/130g |
|------------------------------------------------------------------|-----------------------|----------------------|-----------------------|
| Salmon, <i>farmed</i> , flesh only, <b>grilled/baked/steamed</b> | 14                    | 8.4                  | 18.2                  |
| Salmon, <i>wild</i> , <b>baked</b>                               | 15                    | 9                    | 19.5                  |
| Salmon, <i>wild</i> , <b>grilled/steamed</b>                     | 14                    | 8.4                  | 18.2                  |

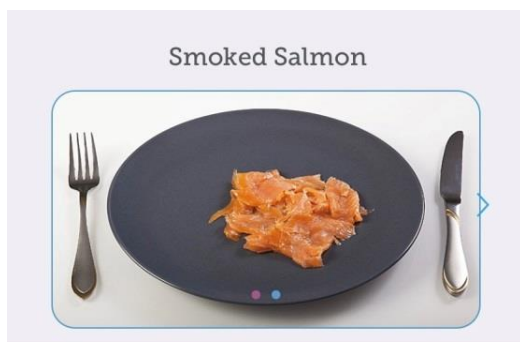

Weight **I = 4.5 µg** 50g

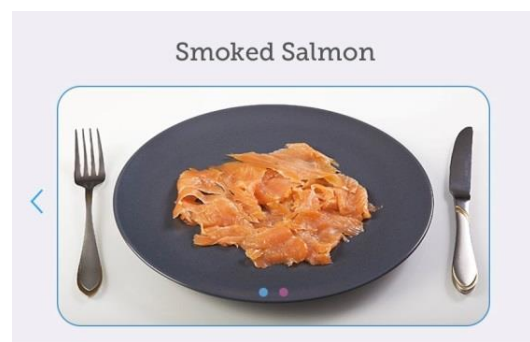

Weight **I = 9 µg** 100g

| Smoked salmon                           | Iodine intake ug/50g | Iodine intake ug/100g |
|-----------------------------------------|----------------------|-----------------------|
| Salmon, <b>smoked</b> (cold/hot-smoked) | 4.5                  | 9                     |

## Tinned Salmon

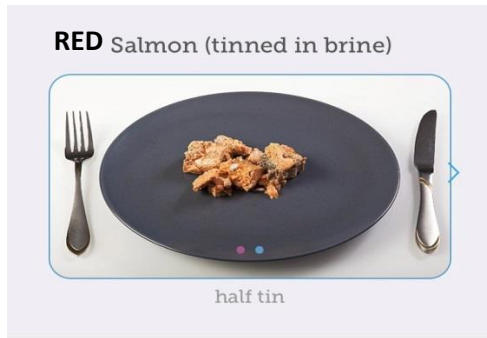

Weight **I = 20.4 µg** 85g

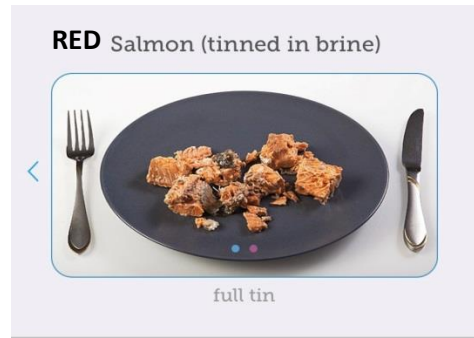

Weight **I = 40.8 µg** 170g

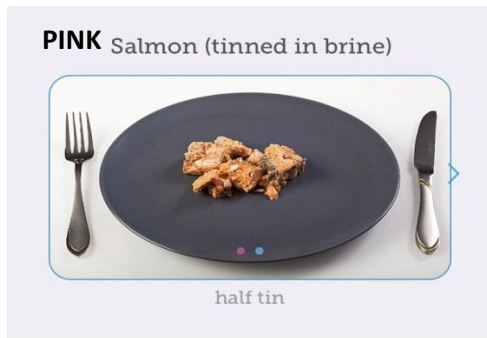

Weight **I = 15.3 µg** 85g

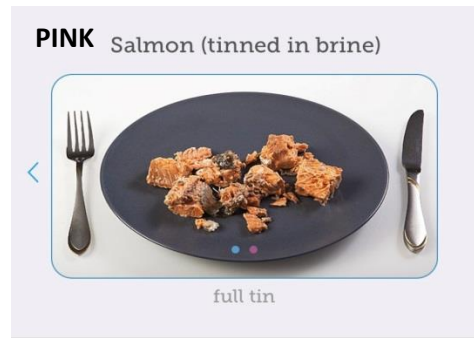

Weight **I = 30.6 µg** 170g

| Canned salmon                                                        | Iodine intake ug/100g | Iodine intake ug/85g | Iodine intake ug/170g |
|----------------------------------------------------------------------|-----------------------|----------------------|-----------------------|
| Salmon, <b>red</b> , canned in brine, skinless and boneless, drained | 24                    | 20.4                 | 40.8                  |
| Salmon, <b>pink</b> , canned in brine, drained                       | 18                    | 15.3                 | 30.6                  |



## Tuna

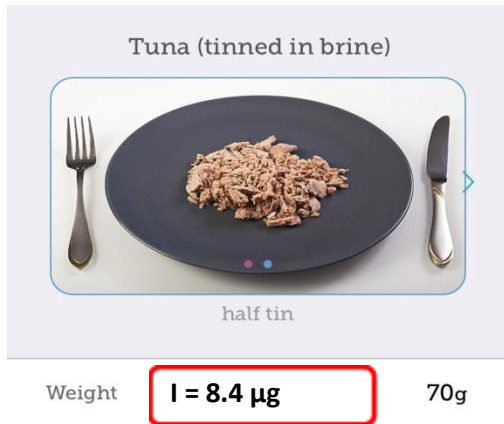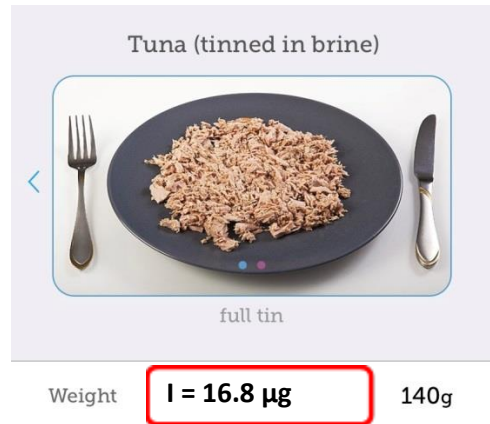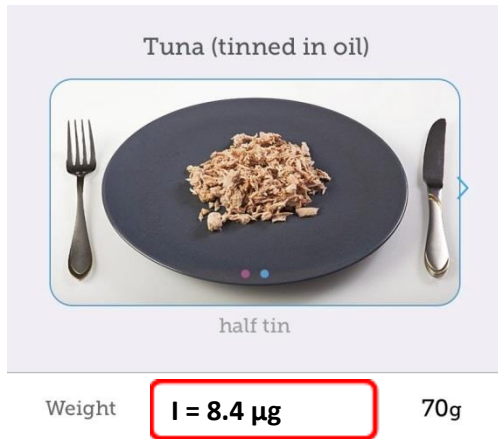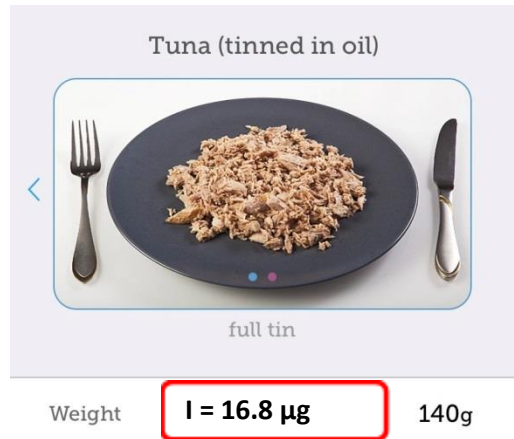

| Tuna                                           | Iodine intake ug/100g | Iodine intake ug/70g | Iodine intake ug/140g |
|------------------------------------------------|-----------------------|----------------------|-----------------------|
| Tuna, canned in <b>brine</b> , drained         | 12                    | 8.4                  | 16.8                  |
| Tuna, canned in <b>sunflower oil</b> , drained | 12                    | 8.4                  | 16.8                  |

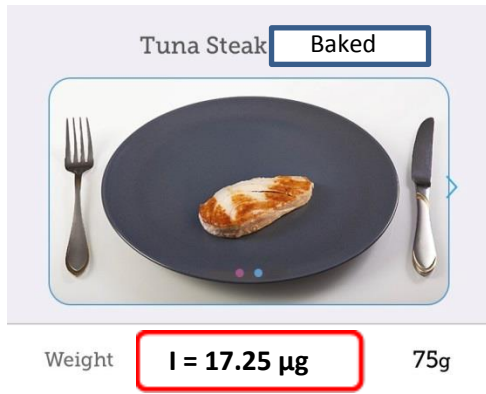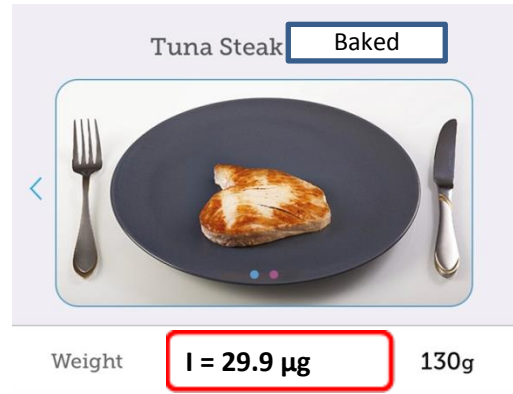

| Tuna                           | Iodine intake ug/100g | Iodine intake ug/75g | Iodine intake ug/130g |
|--------------------------------|-----------------------|----------------------|-----------------------|
| Tuna, flesh only, <b>baked</b> | 23                    | 17.25                | 29.9                  |

## Sardines

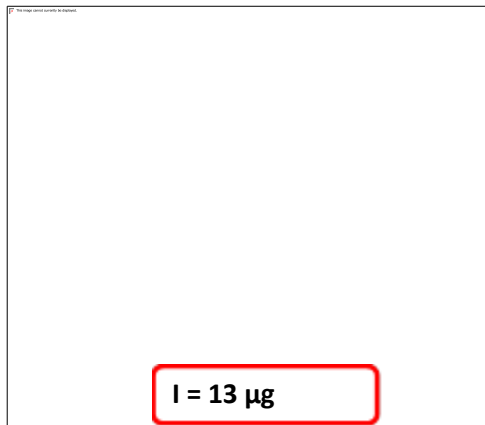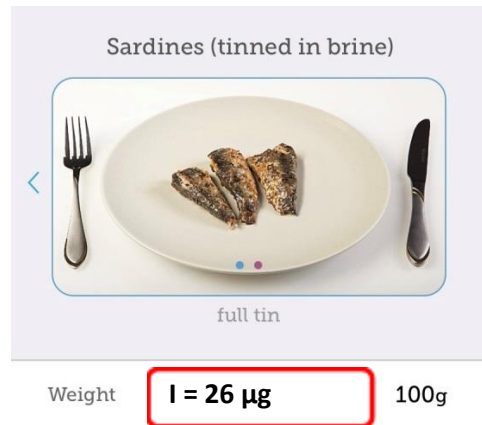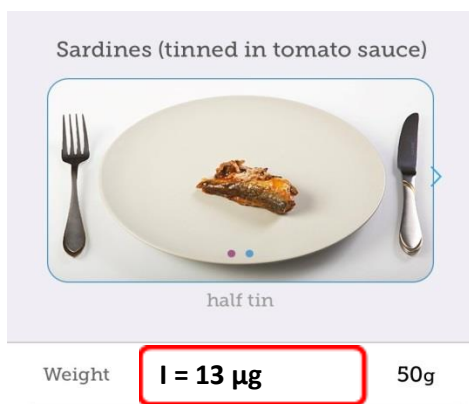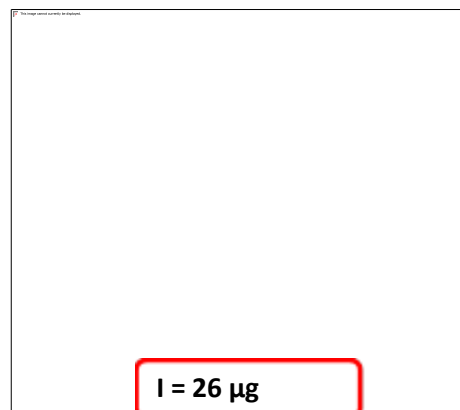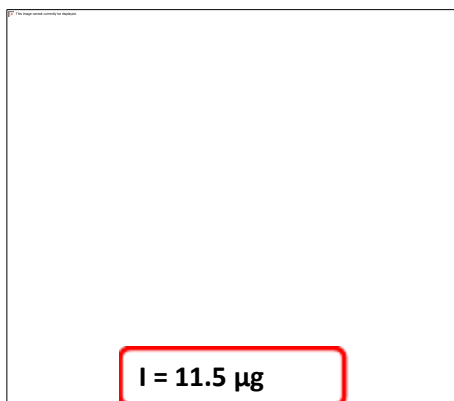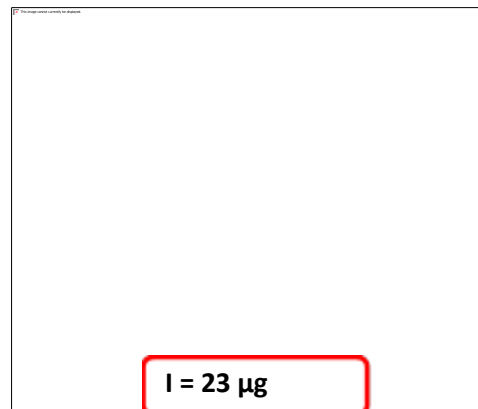

| Sardines                                                  | Iodine intake ug/50g | Iodine intake ug/100g |
|-----------------------------------------------------------|----------------------|-----------------------|
| Sardines, canned in <b>brine</b> , drained / tomato sauce | 13                   | 26                    |
| Sardines, canned in olive/ <b>sunflower oil</b> , drained | 11.5                 | 23                    |

# Mackerel

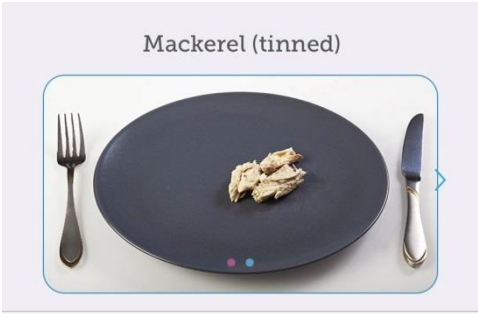

Weight 28g

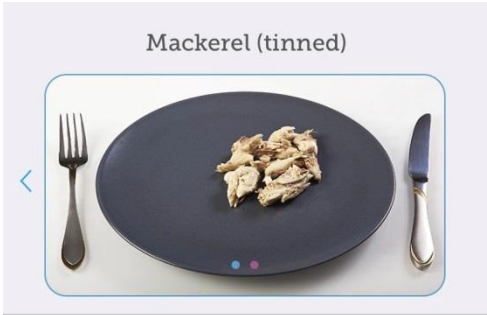

Weight 57g

| Mackerel                             | Iodine intake ug/100g | Iodine intake ug/28g | Iodine intake ug/57g |
|--------------------------------------|-----------------------|----------------------|----------------------|
| Mackerel, flesh only, <b>grilled</b> | 35                    | 9.8                  | 19.95                |

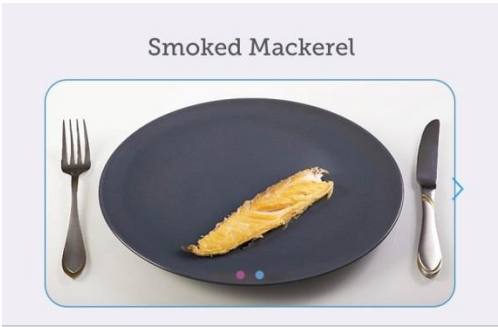

Weight 45g

I = 12.6 µg

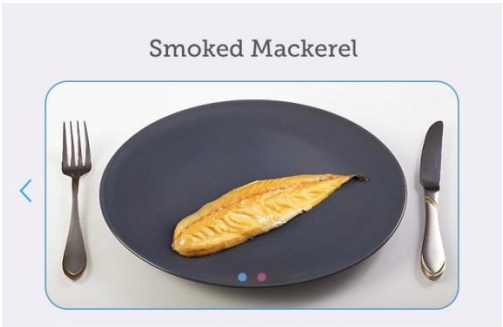

Weight 75g

I = 21 µg

| Mackerel                             | Iodine intake ug/100g | Iodine intake ug/45g | Iodine intake ug/75g |
|--------------------------------------|-----------------------|----------------------|----------------------|
| Mackerel, flesh only, <b>smoked</b>  | 28                    | 12.6                 | 21                   |
| Mackerel, flesh only, <b>grilled</b> | 35                    | 15.75                | 26.25                |
|                                      |                       |                      |                      |

# Prawns

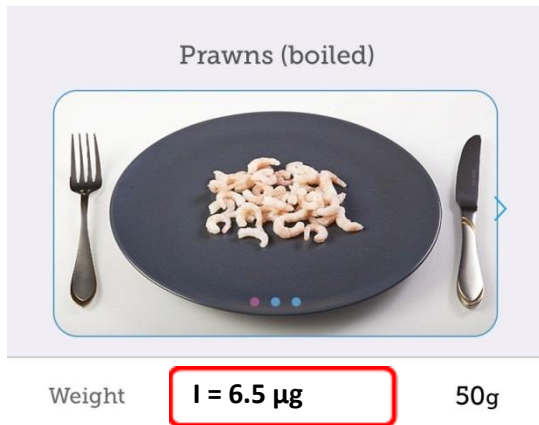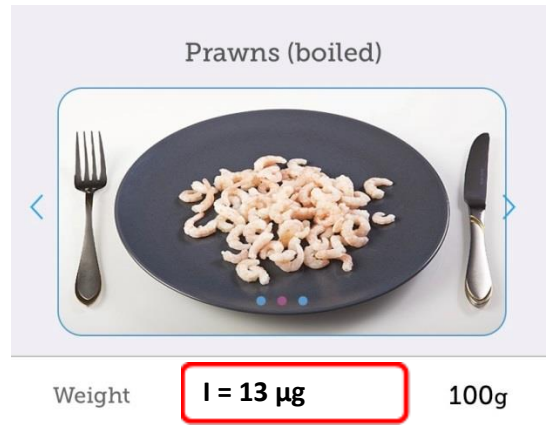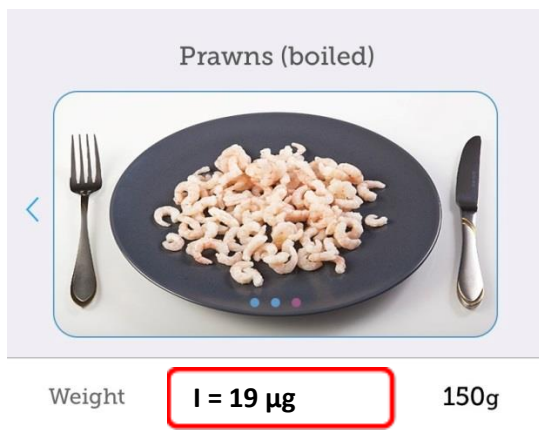

| Prawns                             | Iodine intake ug/50g | Iodine intake ug/100g | Iodine intake ug/150g |
|------------------------------------|----------------------|-----------------------|-----------------------|
| Prawns, standard, purchased cooked | 6.5                  | 13                    | 19                    |

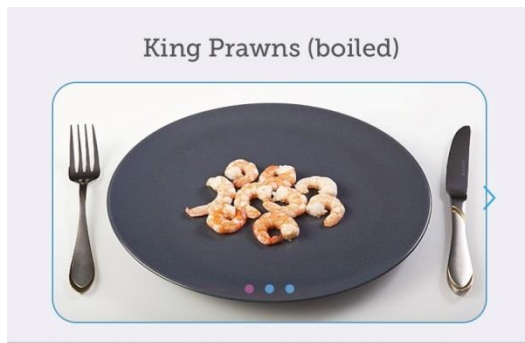

Weight **I = 6 µg** 50g

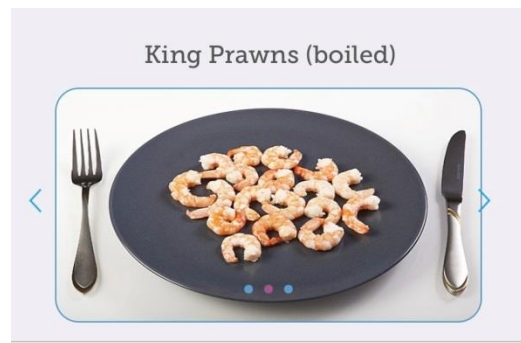

Weight **I = 12 µg** 100g

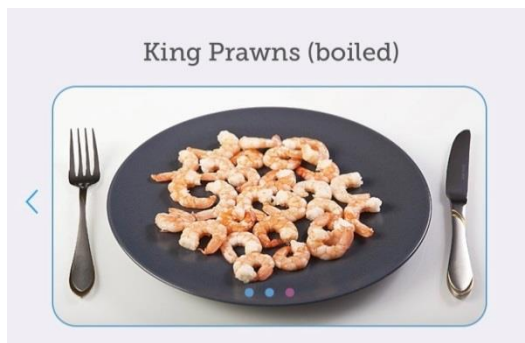

Weight **I = 18 µg** 150g

| Prawns                                   | Iodine intake ug/50g | Iodine intake ug/100g | Iodine intake ug/150g |
|------------------------------------------|----------------------|-----------------------|-----------------------|
| Prawns, king, <b>grilled</b><br>from raw | 3.5                  | 7                     | 10.5                  |
| Prawns, king,<br><b>purchased cooked</b> | 6                    | 12                    | 18                    |

# Scampi

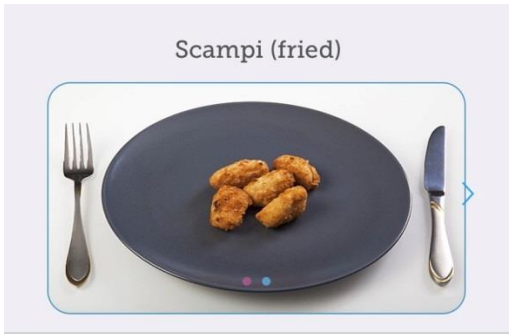

Weight **I = 92 µg/100g** 70g

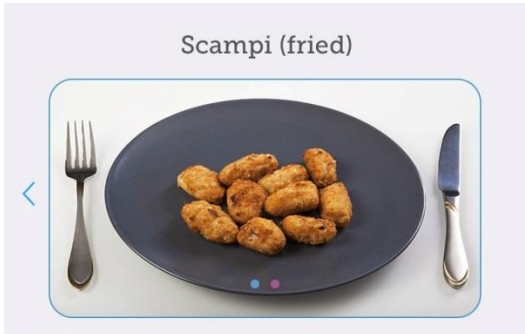

Weight **I = 92 µg/100g** 140g

| Scampi                                             | Iodine intake ug/100g | Iodine intake ug/70g | Iodine intake ug/140g |
|----------------------------------------------------|-----------------------|----------------------|-----------------------|
| Scampi, coated in breadcrumbs, <b>baked</b>        | 101                   | 70.7                 | 141.4                 |
| Scampi, coated in breadcrumbs, fried in <b>oil</b> | 92                    | 64.4                 | 128.8                 |

# Crab Meat

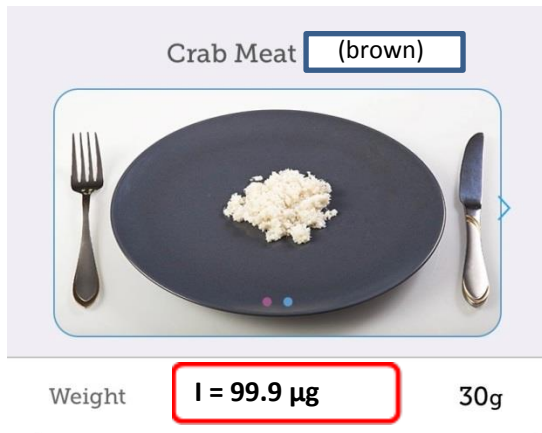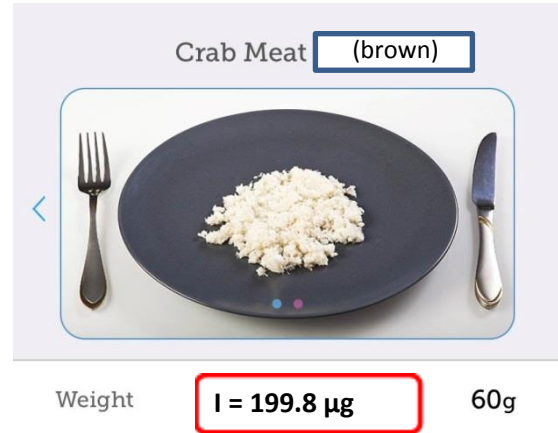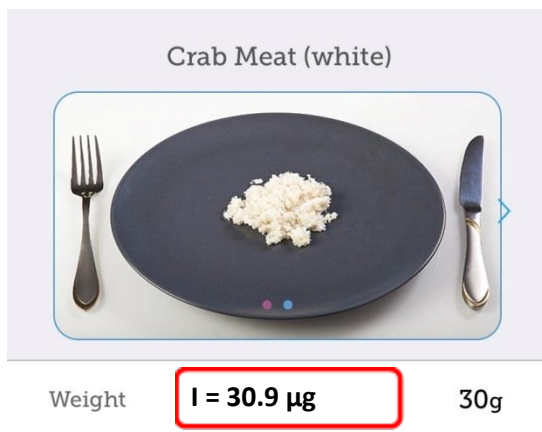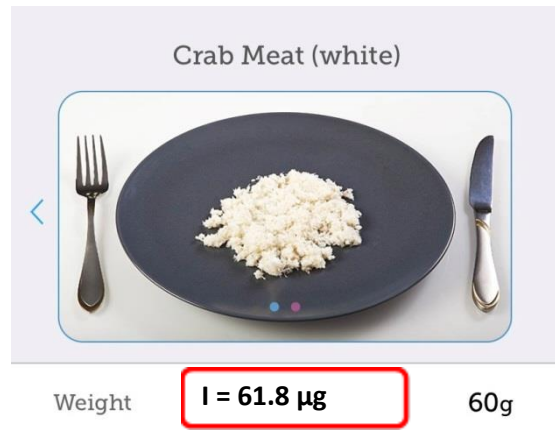

| Crab meat                                  | Iodine intake ug/100g | Iodine intake ug/30g | Iodine intake ug/60g |
|--------------------------------------------|-----------------------|----------------------|----------------------|
| Crab, <i>brown meat</i> , purchased cooked | 333                   | 99.9                 | 199.8                |
| Crab, <i>white meat</i> , purchased cooked | 103                   | 30.9                 | 61.8                 |



## Other

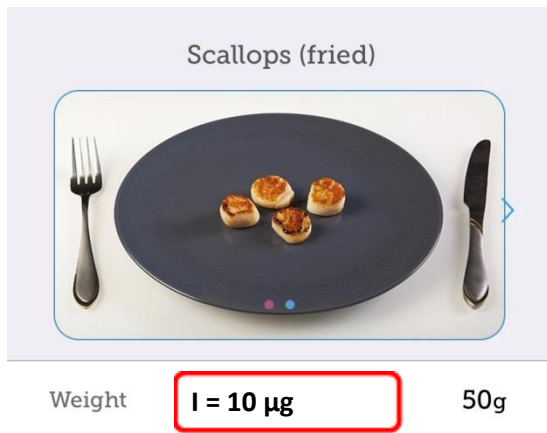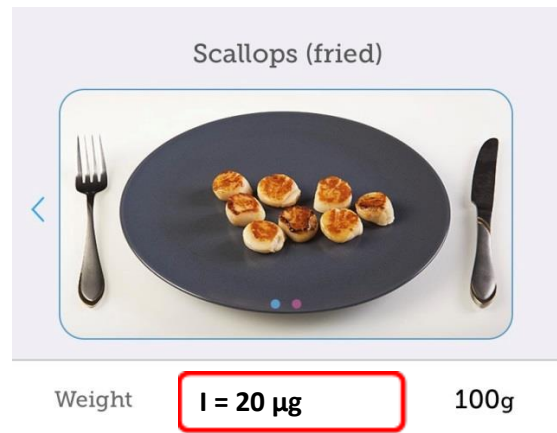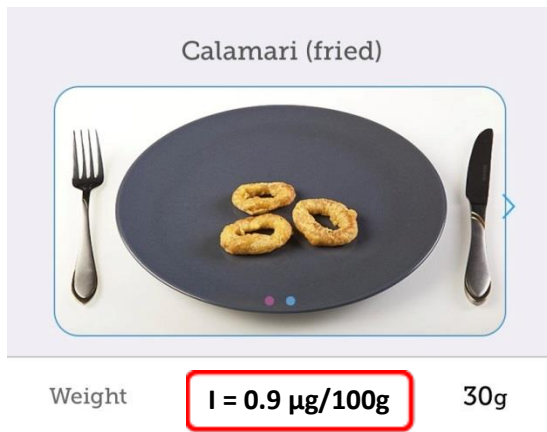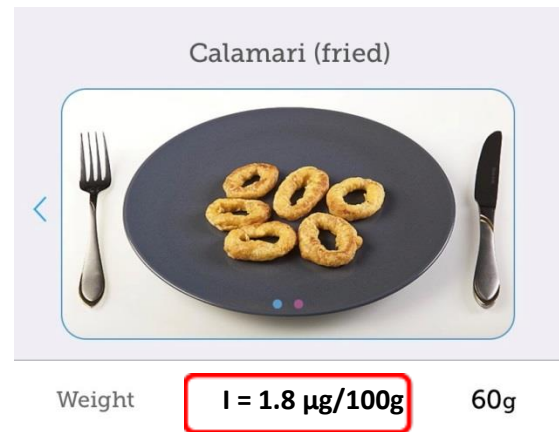

| Scallops                 | Iodine intake ug/50g | Iodine intake ug/100g |
|--------------------------|----------------------|-----------------------|
| Scallops, <b>steamed</b> | 10                   | 20                    |

| Calamari                                 | Iodine intake ug/100g | Iodine intake ug/30g | Iodine intake ug/60g |
|------------------------------------------|-----------------------|----------------------|----------------------|
| Calamari, coated in <b>batter, baked</b> | 3                     | 0.9                  | 1.8                  |

Fish Pie

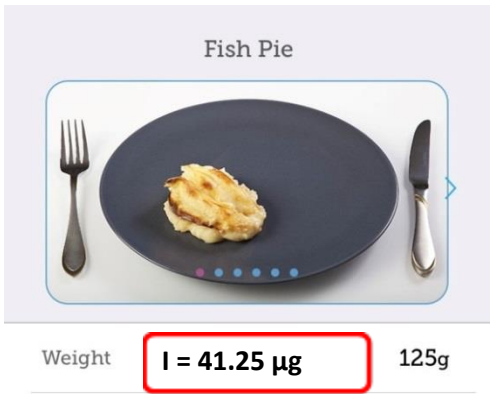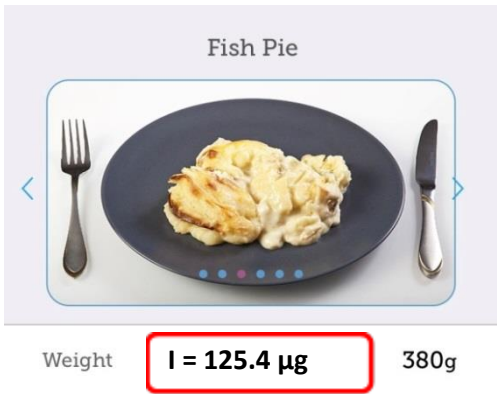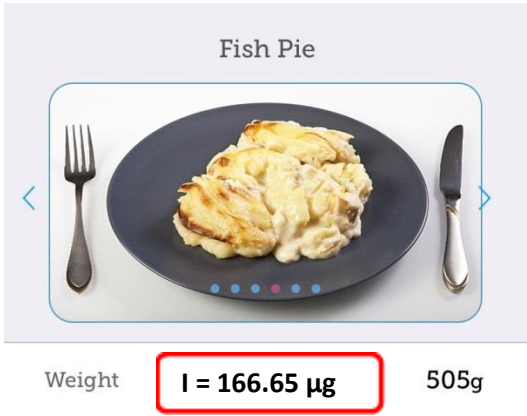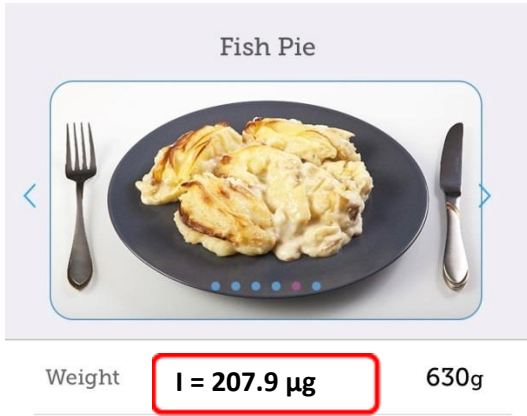

| Fish pie                 | Iodine intake<br>ug/100g | Iodine intake<br>ug/125g | Iodine intake<br>ug/380g | Iodine intake<br>ug/505g | Iodine<br>intake<br>ug/630g |
|--------------------------|--------------------------|--------------------------|--------------------------|--------------------------|-----------------------------|
| Pie, fish,<br>white fish | 33                       | 41.25                    | 125.4                    | 166.65                   | 207.9                       |

## Mussels

**247 ug/100g**

- Each pound of mussels (500g) = 125g mussel meat = roughly 20-25 mussels – [http://bestofsea.com/wp-content/uploads/2015/11/Mussels\\_Guide\\_Spreads\\_P9.pdf](http://bestofsea.com/wp-content/uploads/2015/11/Mussels_Guide_Spreads_P9.pdf)

## Dairy Alternative products

### Milks

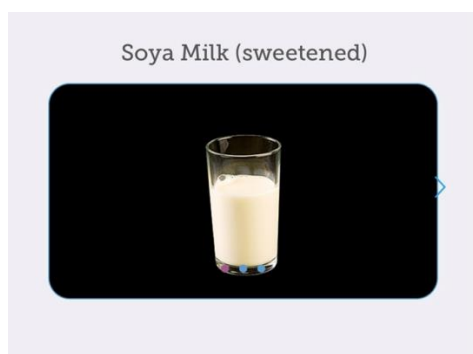

Weight 150ml

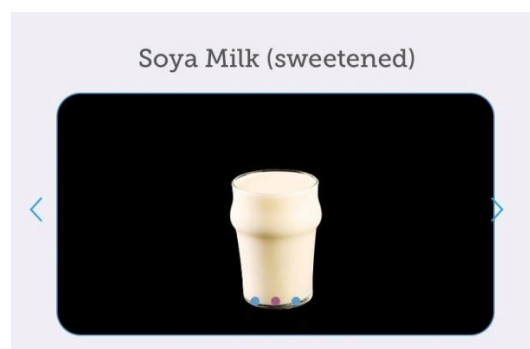

Weight 284ml

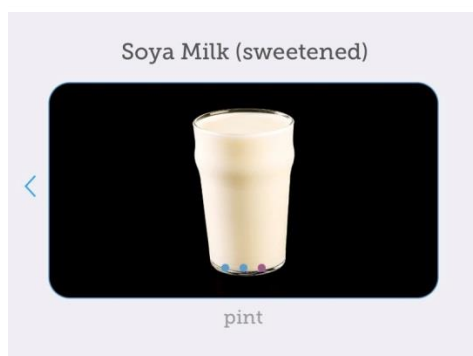

Weight 568ml

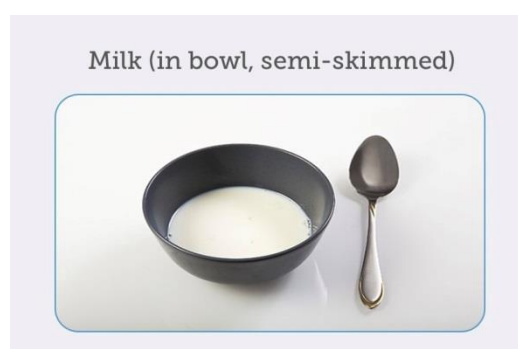

Weight 100ml

| Iodine fortified Plant based Milks   | Iodine content per 100ml |
|--------------------------------------|--------------------------|
| Alpro Soya Growing Up Drink 1-3+     | 24                       |
| Alpro Barista Soya                   | 42                       |
| Koko Super Milk (UHT and Chilled)    | 13                       |
| M&S Plant Kitchen Soya Sweetened     | 45                       |
| M&S Plant Kitchen Soya Unsweetened   | 45                       |
| M&S Plant Kitchen Almond Sweetened   | 45                       |
| M&S Plant Kitchen Almond Unsweetened | 45                       |
| M&S Plant Kitchen Coconut            | 30                       |
| M&S Plant Kitchen Oat                | 30                       |
| M&S Plant Kitchen Chocolate Oat      | 23                       |
| Mighty Pea Original                  | 31                       |
| Mighty Pea Unsweetened               | 31                       |
| Oatly Classic Calcium                | 22.5                     |
| Oatly Barista Foamable               | 22.5                     |
| Oatly Chocolate                      | 225                      |
|                                      |                          |

## Milk outside the home

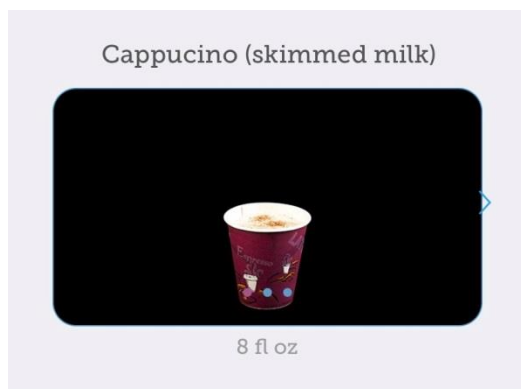

Weight

235ml

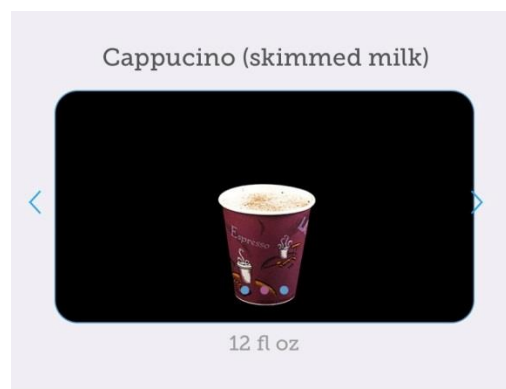

Weight

355ml

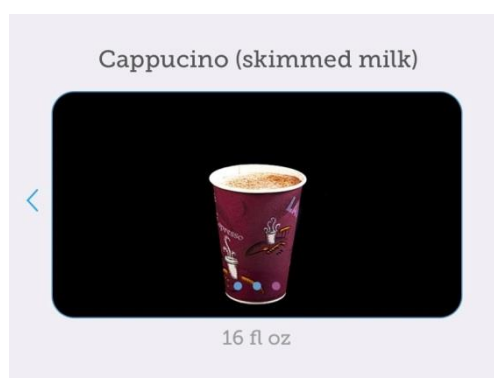

Weight

475ml

| Iodine fortified Plant based Milks   | Iodine content per 100ml | Iodine content per 1L |
|--------------------------------------|--------------------------|-----------------------|
| Alpro Soya Growing Up Drink 1-3+     | 24                       | 240                   |
| Alpro Barista Soya                   | 42                       | 420                   |
| Koko Super Milk (UHT and Chilled)    | 13                       | 130                   |
| M&S Plant Kitchen Soya Sweetened     | 45                       | 450                   |
| M&S Plant Kitchen Soya Unsweetened   | 45                       | 450                   |
| M&S Plant Kitchen Almond Sweetened   | 45                       | 450                   |
| M&S Plant Kitchen Almond Unsweetened | 45                       | 450                   |
| M&S Plant Kitchen Coconut            | 30                       | 300                   |
| M&S Plant Kitchen Oat                | 30                       | 300                   |
| M&S Plant Kitchen Chocolate Oat      | 23                       | 230                   |
| Mighty Pea Original                  | 31                       | 310                   |

|                        |      |     |
|------------------------|------|-----|
| Mighty Pea Unsweetened | 31   | 310 |
| Oatly Classic Calcium  | 22.5 | 225 |
| Oatly Barista Foamable | 22.5 | 225 |
| Oatly Chocolate        | 225  | 225 |
|                        |      |     |

Yogurt

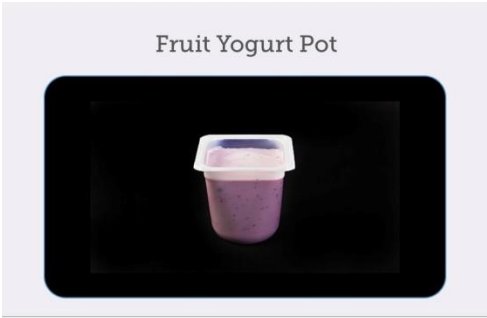

Weight 125g

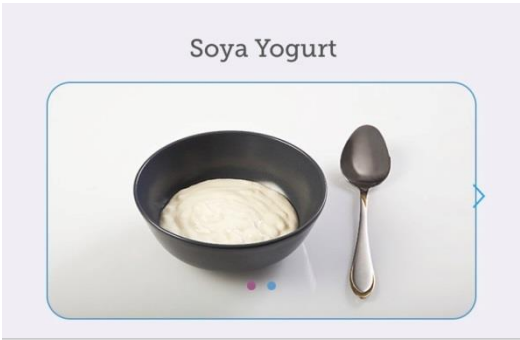

Weight 125g

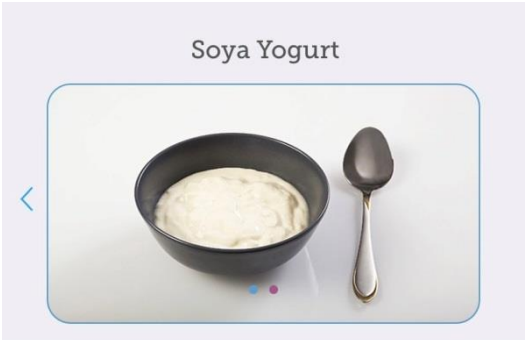

Weight 250g

# Permitted cheeses

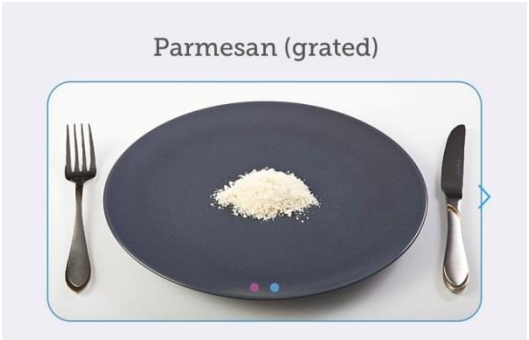

Weight **I = 7.2 µg** 10g

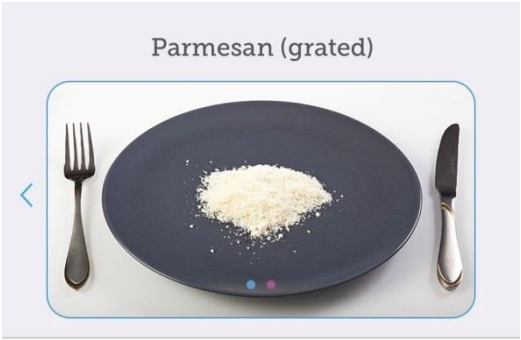

Weight **I = 14.4 µg** 20g

| Parmesan | Iodine intake ug/100g | Iodine intake ug/10g | Iodine intake ug/20g |
|----------|-----------------------|----------------------|----------------------|
| Parmesan | 72                    | 7.2                  | 14.4                 |

## Slices/Grated/Block

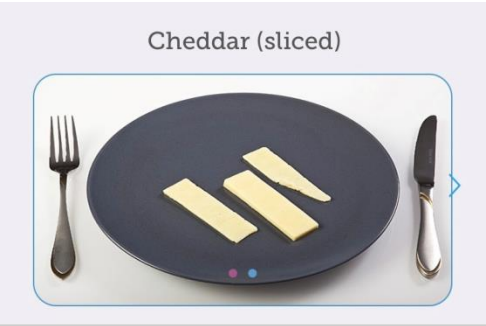

Weight 25g

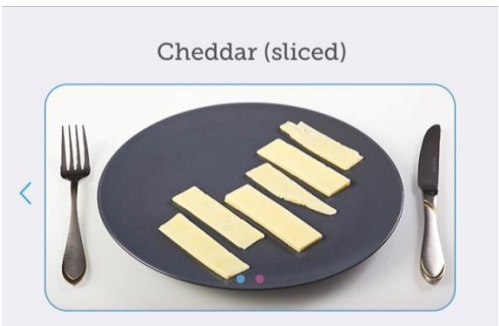

Weight 50g

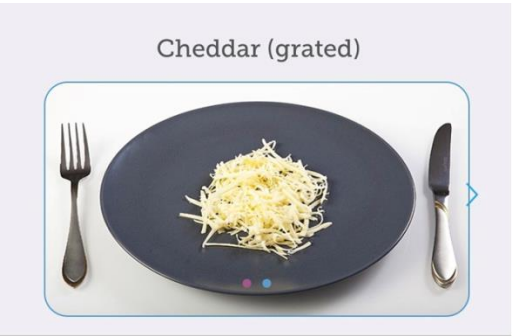

Weight 25g

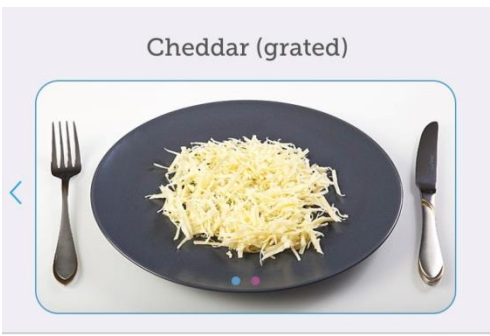

Weight 50g

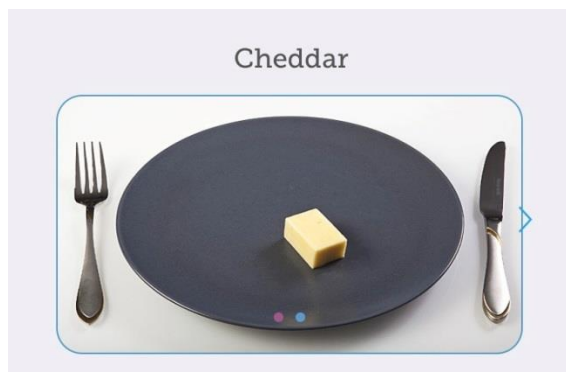

Weight

25g

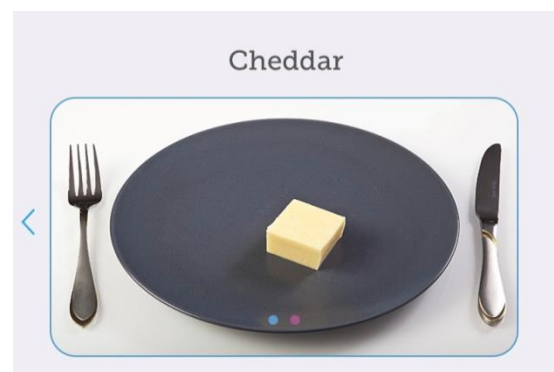

Weight

50g

| Permitted Cheese                          | Iodine intake ug/100g | Iodine intake ug/25g | Iodine intake ug/50g |
|-------------------------------------------|-----------------------|----------------------|----------------------|
| Emmental                                  | 18                    | 4.5                  | 9                    |
| Cheese, hard, average                     | 41                    | 10.25                | 20.5                 |
| Jarlsberg                                 |                       |                      |                      |
| Comte                                     |                       |                      |                      |
| Gruyere                                   |                       |                      |                      |
|                                           |                       |                      |                      |
| <b>Other Cheeses</b>                      |                       |                      |                      |
| Cheese, Brie, with outer rind removed     | 16                    | 4                    | 8                    |
| Cheese, Cheddar, English                  | 30                    | 7.5                  | 15                   |
| Cheese, Halloumi                          | 60                    | 15                   | 30                   |
| Cheese, Mozzarella, fresh                 | 18                    | 4.5                  | 9                    |
| Cheese, processed, plain                  | 27                    | 6.75                 | 13.5                 |
| Cheese, spreadable, full fat, soft, white | 11                    | 2.75                 | 5.5                  |



## Other foods

### Fresh pasta – 36 µg/100g

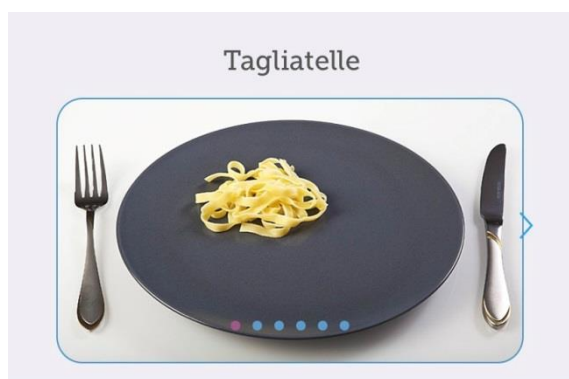

Weight

**I = 10.8 µg**

30g

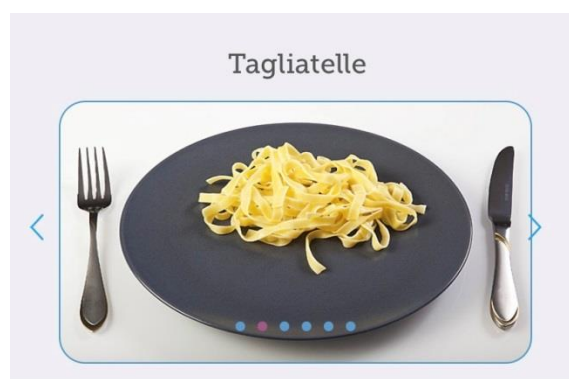

Weight

**I = 32.4 µg**

90g

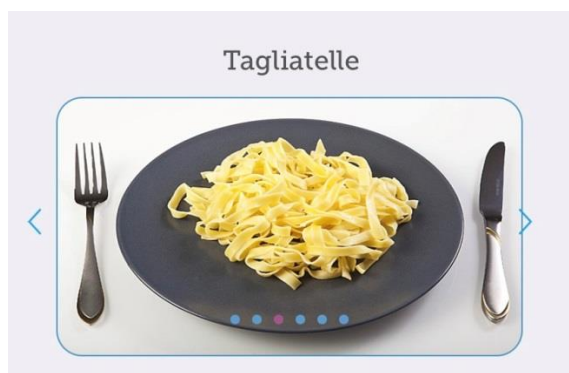

Weight

**I = 54 µg**

150g

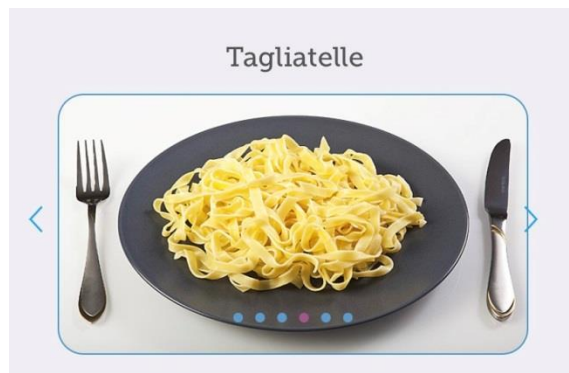

Weight

**I = 75.6 µg**

210g

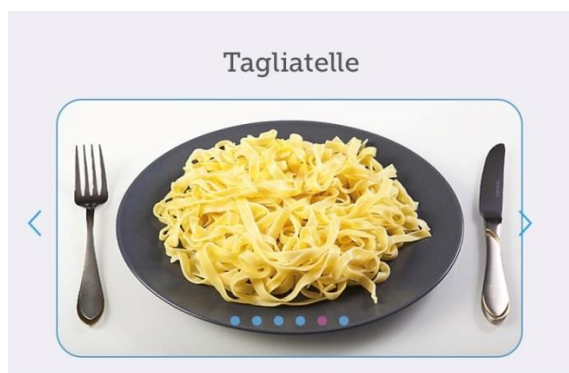

Weight

**I = 97.2 µg**

270g

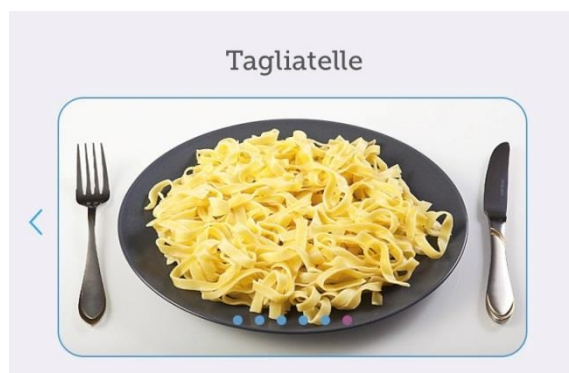

Weight

**I = 118.8 µg**

330g

## Eggs - 58 $\mu\text{g}/100\text{g}$

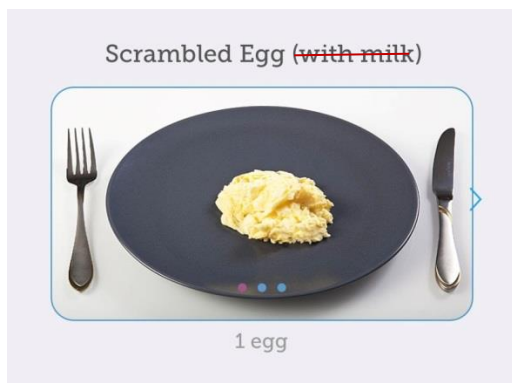

Weight

**I = 40.6  $\mu\text{g}$**

70g

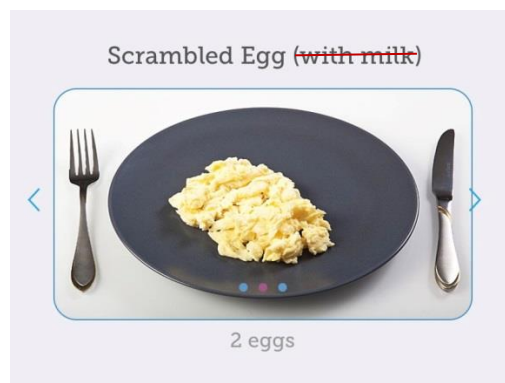

Weight

**I = 69.6  $\mu\text{g}$**

120g

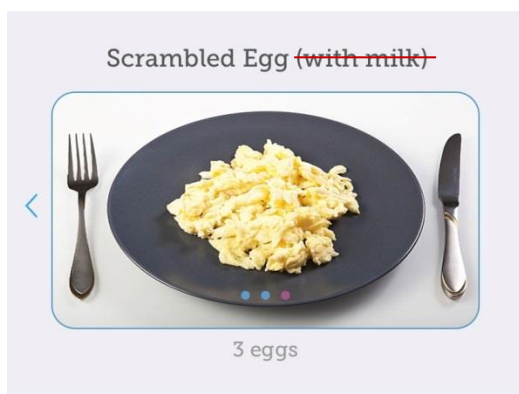

Weight

**I = 104.4  $\mu\text{g}$**

180g

| Eggs                                                   | Iodine intake<br>$\mu\text{g}/70\text{g}$ | Iodine intake<br>$\mu\text{g}/120\text{g}$ | Iodine intake<br>$\mu\text{g}/180\text{g}$ |
|--------------------------------------------------------|-------------------------------------------|--------------------------------------------|--------------------------------------------|
| Eggs, chicken,<br>whole,<br>scrambled,<br>without milk | 40.6                                      | 69.6                                       | 104.4                                      |

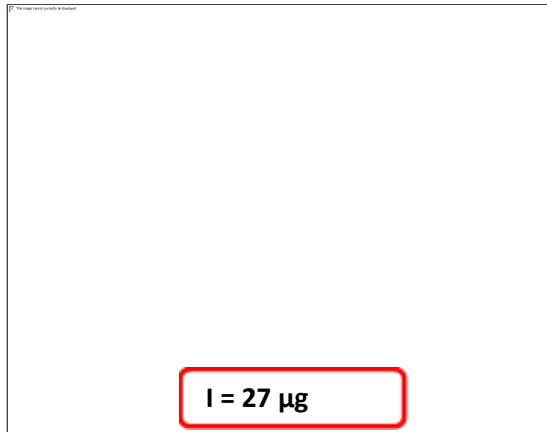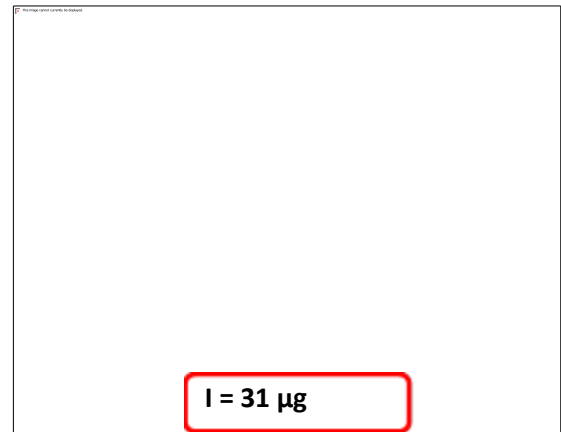

| Eggs                             | Iodine intake<br>ug/100g |
|----------------------------------|--------------------------|
| Eggs, chicken,<br>whole, poached | 54                       |
| Eggs, chicken,<br>whole, boiled  | 52                       |

## Other foods

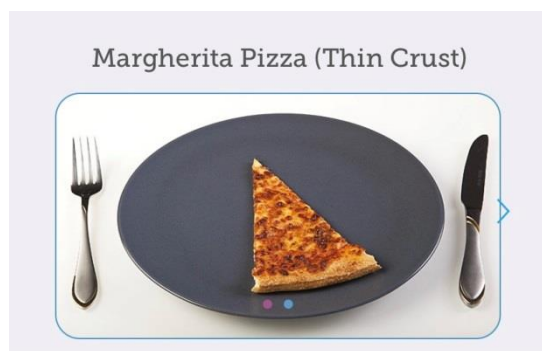

Weight

40g

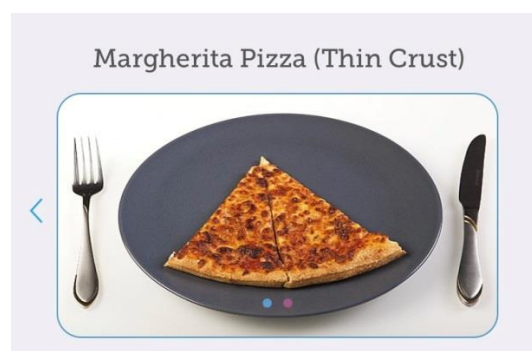

Weight

70g

| Pizza deep pan/thin crust slices            | Type of Pizza            | Weight of cheese (g) | Emmental iodine intake | Cheese, hard, average iodine intake | Cheese, Port Salut, St Paulin type iodine intake | Cheese, Mozzarella, fresh iodine intake |
|---------------------------------------------|--------------------------|----------------------|------------------------|-------------------------------------|--------------------------------------------------|-----------------------------------------|
| 5" diameter                                 | Average, cheese & tomato | 116                  | 20.88                  | 47.56                               | 27.84                                            | 20.88                                   |
|                                             | Meat/fish                | 160                  | 28.8                   | 65.6                                | 38.4                                             | 28.8                                    |
|                                             | Vegetarian               | 150                  | 27                     | 61.5                                | 36                                               | 27                                      |
|                                             | 'Special'                | 190                  | 34.2                   | 77.9                                |                                                  | 34.2                                    |
| 6" diameter children's                      | Average, cheese & tomato | 220                  | 39.6                   | 90.2                                | 45.6                                             | 39.6                                    |
| 7" diameter (serves 1)                      | Average, cheese & tomato | 230                  | 41.4                   | 94.3                                | 55.2                                             | 41.4                                    |
|                                             | Meat/fish                | 29                   | 5.22                   | 11.89                               | 6.96                                             | 5.22                                    |
|                                             | Vegetarian               | 300                  | 54                     | 123                                 | 72                                               | 54                                      |
|                                             | 'Special'                | 360                  | 64.8                   | 147.6                               | 86.4                                             | 64.8                                    |
| 1 slice = ¼ of total weight of pizza        |                          |                      |                        |                                     |                                                  |                                         |
| 9-10" diameter (serves 1-2)                 | Average, cheese & tomato | 410                  | 73.8                   | 168.1                               | 98.4                                             | 73.8                                    |
|                                             | Meat/fish                | 500                  | 90                     | 205                                 | 49.2                                             | 90                                      |
|                                             | Vegetarian               | 500                  | 90                     | 205                                 | 49.2                                             | 90                                      |
|                                             | 'Special'                | 580                  | 104.4                  | 237.8                               | 139.2                                            | 104.4                                   |
| 1 slice = 1/6 <sup>th</sup> of total weight |                          |                      |                        |                                     |                                                  |                                         |

|                                                                    |                                |     |       |       |       |       |
|--------------------------------------------------------------------|--------------------------------|-----|-------|-------|-------|-------|
| <i>of pizza</i>                                                    |                                |     |       |       |       |       |
| 12" diameter<br>(serves 2-3)                                       | Average,<br>cheese &<br>tomato | 700 | 287   | 287   | 168   | 287   |
|                                                                    | Meat/fish                      | 800 | 144   | 328   | 192   | 144   |
|                                                                    | Vegetarian                     | 800 | 328   | 328   | 192   | 328   |
|                                                                    | 'Special'                      | 890 | 160.2 | 364.9 | 213.6 | 160.2 |
| <i>1 slice = 1/8<sup>th</sup><br/>of total weight<br/>of pizza</i> |                                |     |       |       |       |       |
|                                                                    |                                |     |       |       |       |       |
|                                                                    |                                |     |       |       |       |       |

| <b>Pizza thin crust<br/>slices</b>                                 | <b>Type of Pizza</b>        | <b>Weight of<br/>cheese (g)</b> | <b>Emmental<br/>Iodine<br/>intake</b> | <b>Cheese,<br/>hard,<br/>average<br/>Iodine<br/>intake</b> | <b>Cheese,<br/>Mozzarella,<br/>fresh<br/>Iodine<br/>intake</b> |
|--------------------------------------------------------------------|-----------------------------|---------------------------------|---------------------------------------|------------------------------------------------------------|----------------------------------------------------------------|
| 7" diameter<br>(serves 1)                                          | Average, cheese<br>& tomato | 116                             | 20.88                                 | 47.56                                                      | 20.88                                                          |
|                                                                    | Meat/fish                   | 150                             | 27                                    | 11.07                                                      | 27                                                             |
|                                                                    | Vegetarian                  | 150                             | 27                                    | 11.07                                                      | 27                                                             |
|                                                                    | 'Special'                   | 190                             | 34.2                                  | 77.9                                                       | 34.2                                                           |
| <i>1 slice = ¼ of total<br/>weight of pizza</i>                    |                             |                                 |                                       |                                                            |                                                                |
| 9-10" diameter<br>(serves 1-2)                                     | Average, cheese<br>& tomato | 260                             | 46.8                                  | 106.6                                                      | 46.8                                                           |
|                                                                    | Meat/fish                   | 310                             | 55.8                                  | 127.1                                                      | 55.8                                                           |
|                                                                    | Vegetarian                  | 340                             | 61.2                                  | 139.4                                                      | 61.2                                                           |
|                                                                    | 'Special'                   | 350                             | 63                                    | 143.5                                                      | 63                                                             |
| <i>1 slice = 1/6<sup>th</sup> of<br/>total weight of<br/>pizza</i> |                             |                                 |                                       |                                                            |                                                                |
| 12" diameter<br>(serves 2-3)                                       | Average, cheese<br>& tomato | 560                             | 163.8                                 | 229.6                                                      | 163.8                                                          |
|                                                                    | Meat/fish                   | 660                             | 118.8                                 | 500.2                                                      | 118.8                                                          |
|                                                                    | Vegetarian                  | 660                             | 118.8                                 | 500.2                                                      | 118.8                                                          |
|                                                                    | 'Special'                   | 740                             | 133.2                                 | 303.4                                                      | 133.2                                                          |
| <i>1 slice = 1/8<sup>th</sup> of<br/>total weight of<br/>pizza</i> |                             |                                 |                                       |                                                            |                                                                |

| Type of Pizza  | Size              | Weight of cheese (g) | Emmental/Moz iodine intake | Cheese, hard, average iodine intake |
|----------------|-------------------|----------------------|----------------------------|-------------------------------------|
| Chilled/frozen | Large             | 350-500              | 63-90                      | 143.5-205                           |
|                | Medium            | 200                  | 36                         | 82                                  |
| Frozen         | Fun size          | 40                   | 7.2                        | 16.4                                |
|                | Individual slices | 100                  | 18                         | 41                                  |
|                | Small             | 100                  | 18                         | 41                                  |
| Homemade       | Average portion   | 300                  | 54                         | 123                                 |

## Quiche

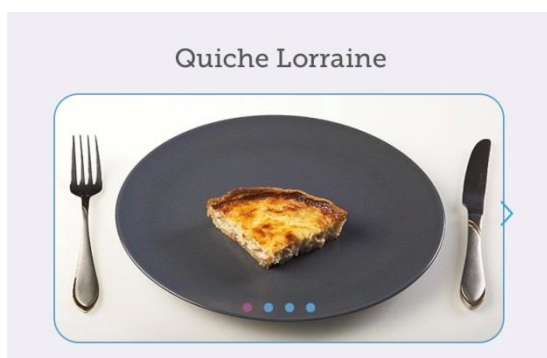

Weight

100g

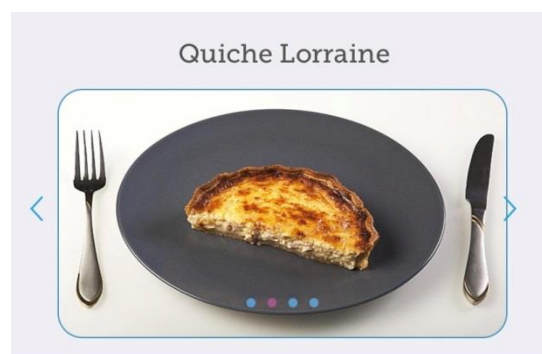

Weight

200g

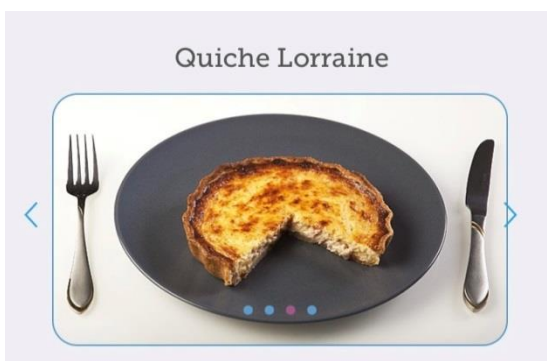

Weight

300g

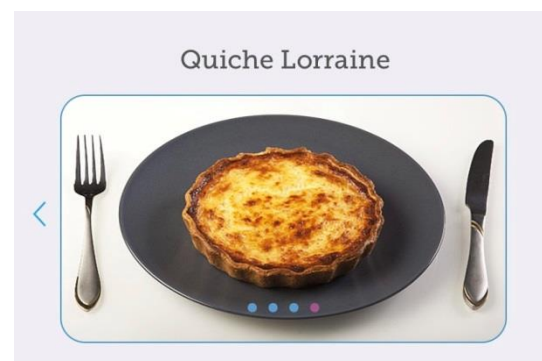

Weight

400g

# Iodised salt

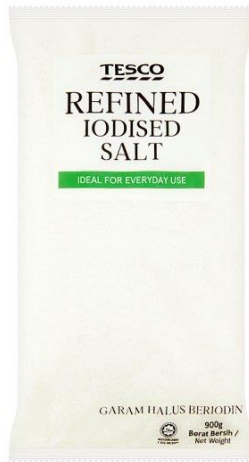

## *Sushi*

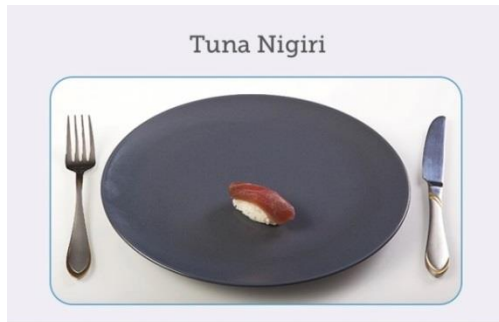

Weight

**I = 1.12  $\mu$ g**

28g

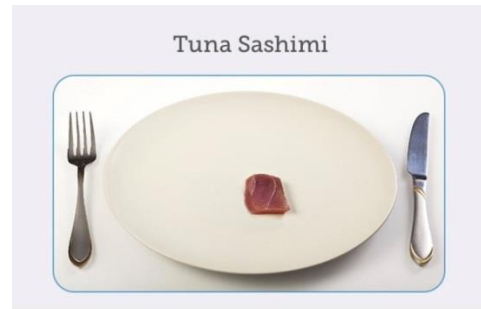

Weight

**I = 1.12  $\mu$ g**

15g

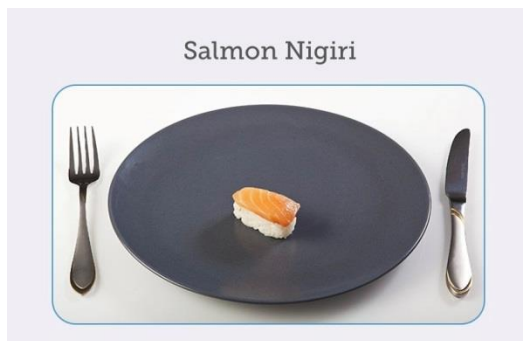

Weight

**I = 1.36  $\mu$ g**

34g

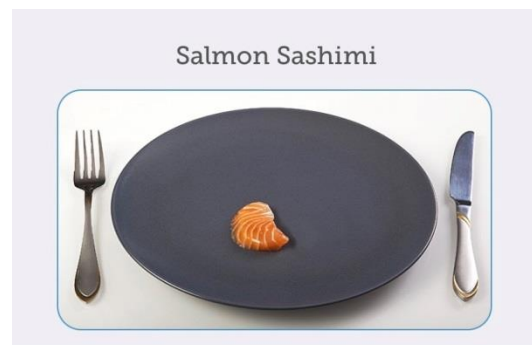

Weight

**I = 1.36  $\mu$ g**

15g

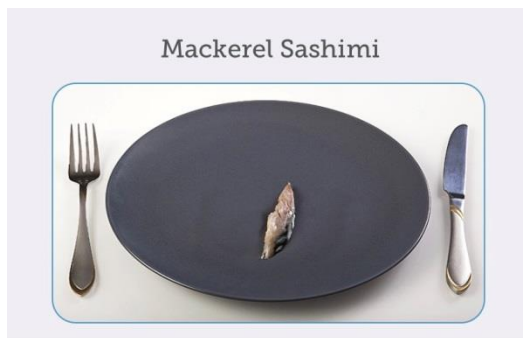

Weight

**I = 5.25  $\mu$ g**

15g



# Cashew Nuts

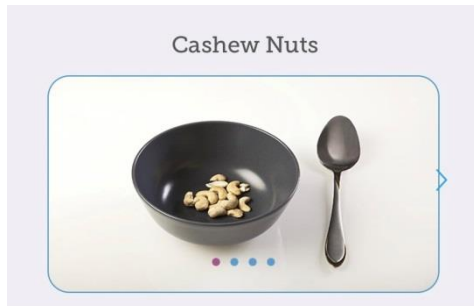

Weight **I = 1.1  $\mu$ g** 10g

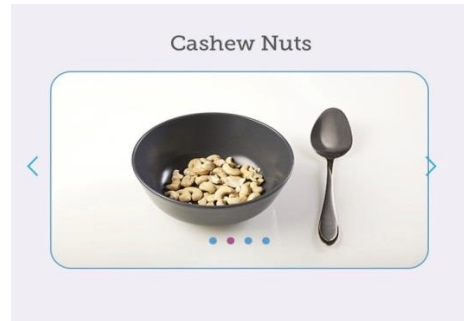

Weight **I = 3.3  $\mu$ g** 30g

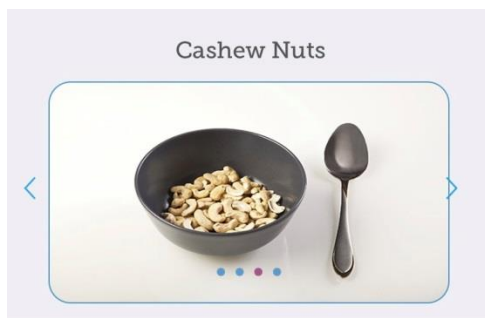

Weight **I = 6.6  $\mu$ g** 60g

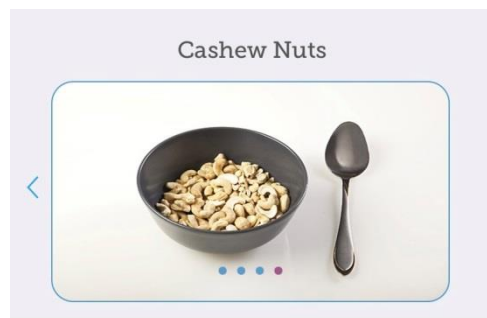

Weight **I = 11  $\mu$ g** 100g
