# Supplementary material for: Assessment of Dietary Intake of Iodine and Risk of Iodine Deficiency in Children with Classical Galactosaemia on Dietary Treatment
Source: MDPI journal article supplement (doi:10.3390/nu15020407), 2023-01-13
Supplement: s1 [file s1]

## Demographic Questionnaire

Name \_\_\_\_\_

Date \_\_\_\_\_

What is the sex of your child?

☐ Male    ☐ Female

What age is your child?

What is your child's ethnic or cultural background (tick most appropriate box)?

### A. White

1. ☐ Irish
2. ☐ Irish Traveller
3. ☐ Any other White background

**B. Black or Black Irish**

4. ☐ African
5. ☐ Any other Black background

**C. Asian or Asian Irish**

6. ☐ Chinese
7. ☐ Any other Asian background

**D. Other including mixed background**

8. ☐ Other, write in description

**What is the highest level of education you the parent/guardian have completed?**



[illegible]

[illegible]

|                                                                                                                                                                   |                                        |                         |                     |  |                        |  |                    |  |                           |  |                           |  |                   |  |                             |  |
|-------------------------------------------------------------------------------------------------------------------------------------------------------------------|----------------------------------------|-------------------------|---------------------|--|------------------------|--|--------------------|--|---------------------------|--|---------------------------|--|-------------------|--|-----------------------------|--|
| <b>Fish/shellfish</b><br><i>(Eaten at home or from restaurant/take away. Cooked any way including crumbed/ battered or in meals like stir-fry, pasta or soup)</i> | <b>Never or less than once a month</b> |                         | <b>Once a month</b> |  | <b>Once in 2 weeks</b> |  | <b>Once a week</b> |  | <b>2-3 times per week</b> |  | <b>4-6 times per week</b> |  | <b>Once a day</b> |  | <b>More than once a day</b> |  |
|                                                                                                                                                                   | <b>Iodine intake (µg)</b>              | <b>Portion size (g)</b> |                     |  |                        |  |                    |  |                           |  |                           |  |                   |  |                             |  |
| <b>OTHER</b>                                                                                                                                                      |                                        |                         |                     |  |                        |  |                    |  |                           |  |                           |  |                   |  |                             |  |
| <b>Fish paste/fish spread/ Fish pâté</b>                                                                                                                          |                                        |                         |                     |  |                        |  |                    |  |                           |  |                           |  |                   |  |                             |  |
| <b>Fish pie</b>                                                                                                                                                   |                                        |                         |                     |  |                        |  |                    |  |                           |  |                           |  |                   |  |                             |  |
| <b>Dairy alternative products</b>                                                                                                                                 |                                        |                         |                     |  |                        |  |                    |  |                           |  |                           |  |                   |  |                             |  |
| <b>Milk – What type of dairy alternative milk does your child drink? How much do they drink in one week?</b>                                                      |                                        |                         |                     |  |                        |  |                    |  |                           |  |                           |  |                   |  |                             |  |
| <b>SMA wysoy</b>                                                                                                                                                  |                                        |                         |                     |  |                        |  |                    |  |                           |  |                           |  |                   |  |                             |  |
| <b>Neocate</b>                                                                                                                                                    |                                        |                         |                     |  |                        |  |                    |  |                           |  |                           |  |                   |  |                             |  |
| <i>If yes, how do you make it up?</i>                                                                                                                             |                                        |                         |                     |  |                        |  |                    |  |                           |  |                           |  |                   |  |                             |  |
|                                                                                                                                                                   |                                        |                         |                     |  |                        |  |                    |  |                           |  |                           |  |                   |  |                             |  |
|                                                                                                                                                                   |                                        |                         |                     |  |                        |  |                    |  |                           |  |                           |  |                   |  |                             |  |
|                                                                                                                                                                   |                                        |                         |                     |  |                        |  |                    |  |                           |  |                           |  |                   |  |                             |  |
|                                                                                                                                                                   |                                        |                         |                     |  |                        |  |                    |  |                           |  |                           |  |                   |  |                             |  |
| <b>Soya</b>                                                                                                                                                       |                                        |                         |                     |  |                        |  |                    |  |                           |  |                           |  |                   |  |                             |  |
|                                                                                                                                                                   |                                        |                         |                     |  |                        |  |                    |  |                           |  |                           |  |                   |  |                             |  |
|                                                                                                                                                                   |                                        |                         |                     |  |                        |  |                    |  |                           |  |                           |  |                   |  |                             |  |
|                                                                                                                                                                   |                                        |                         |                     |  |                        |  |                    |  |                           |  |                           |  |                   |  |                             |  |
|                                                                                                                                                                   |                                        |                         |                     |  |                        |  |                    |  |                           |  |                           |  |                   |  |                             |  |
| <b>Almond/Nut</b>                                                                                                                                                 |                                        |                         |                     |  |                        |  |                    |  |                           |  |                           |  |                   |  |                             |  |
|                                                                                                                                                                   |                                        |                         |                     |  |                        |  |                    |  |                           |  |                           |  |                   |  |                             |  |
|                                                                                                                                                                   |                                        |                         |                     |  |                        |  |                    |  |                           |  |                           |  |                   |  |                             |  |
|                                                                                                                                                                   |                                        |                         |                     |  |                        |  |                    |  |                           |  |                           |  |                   |  |                             |  |
|                                                                                                                                                                   |                                        |                         |                     |  |                        |  |                    |  |                           |  |                           |  |                   |  |                             |  |
|                                                                                                                                                                   |                                        |                         |                     |  |                        |  |                    |  |                           |  |                           |  |                   |  |                             |  |

Oat

Pea

## Coconut

**Would your child ever consume dairy alternative milks outside the home? For eg in tea, hot chocolate etc**

*If so, how much and how often?*

[illegible]

| Permitted cheeses                                                                                                                                                                        | Never or less than once a month |                  | Once a month |  | Once in 2 weeks |  | Once a week |  | 2-3 times per week |  | 4-6 times per week |  | Once a day |  | More than once a day |  |
|------------------------------------------------------------------------------------------------------------------------------------------------------------------------------------------|---------------------------------|------------------|--------------|--|-----------------|--|-------------|--|--------------------|--|--------------------|--|------------|--|----------------------|--|
|                                                                                                                                                                                          | Iodine intake (µg)              | Portion size (g) |              |  |                 |  |             |  |                    |  |                    |  |            |  |                      |  |
| Comté, Emmental, Jarlsberg, Italian Parmesan, Grana Padano, Vintage/Extra Mature cheese                                                                                                  |                                 |                  |              |  |                 |  |             |  |                    |  |                    |  |            |  |                      |  |
|                                                                                                                                                                                          |                                 |                  |              |  |                 |  |             |  |                    |  |                    |  |            |  |                      |  |
|                                                                                                                                                                                          |                                 |                  |              |  |                 |  |             |  |                    |  |                    |  |            |  |                      |  |
|                                                                                                                                                                                          |                                 |                  |              |  |                 |  |             |  |                    |  |                    |  |            |  |                      |  |
|                                                                                                                                                                                          |                                 |                  |              |  |                 |  |             |  |                    |  |                    |  |            |  |                      |  |
|                                                                                                                                                                                          |                                 |                  |              |  |                 |  |             |  |                    |  |                    |  |            |  |                      |  |
|                                                                                                                                                                                          |                                 |                  |              |  |                 |  |             |  |                    |  |                    |  |            |  |                      |  |
| Dairy alternative cheeses or other cheeses                                                                                                                                               | Never or less than once a month |                  | Once a month |  | Once in 2 weeks |  | Once a week |  | 2-3 times per week |  | 4-6 times per week |  | Once a day |  | More than once a day |  |
|                                                                                                                                                                                          | Iodine intake (µg)              | Portion size (g) |              |  |                 |  |             |  |                    |  |                    |  |            |  |                      |  |
|                                                                                                                                                                                          |                                 |                  |              |  |                 |  |             |  |                    |  |                    |  |            |  |                      |  |
|                                                                                                                                                                                          |                                 |                  |              |  |                 |  |             |  |                    |  |                    |  |            |  |                      |  |
|                                                                                                                                                                                          |                                 |                  |              |  |                 |  |             |  |                    |  |                    |  |            |  |                      |  |
|                                                                                                                                                                                          |                                 |                  |              |  |                 |  |             |  |                    |  |                    |  |            |  |                      |  |
|                                                                                                                                                                                          |                                 |                  |              |  |                 |  |             |  |                    |  |                    |  |            |  |                      |  |
|                                                                                                                                                                                          |                                 |                  |              |  |                 |  |             |  |                    |  |                    |  |            |  |                      |  |
|                                                                                                                                                                                          |                                 |                  |              |  |                 |  |             |  |                    |  |                    |  |            |  |                      |  |
| Egg                                                                                                                                                                                      |                                 |                  |              |  |                 |  |             |  |                    |  |                    |  |            |  |                      |  |
| How many eggs does your child eat per week?<br><i>What type of egg? Normal/duck</i><br><br><i>Do they eat the whole of the egg? Do they have a preference for the white or the yolk?</i> |                                 |                  |              |  |                 |  |             |  |                    |  |                    |  |            |  |                      |  |
|                                                                                                                                                                                          |                                 |                  |              |  |                 |  |             |  |                    |  |                    |  |            |  |                      |  |
|                                                                                                                                                                                          |                                 |                  |              |  |                 |  |             |  |                    |  |                    |  |            |  |                      |  |
|                                                                                                                                                                                          |                                 |                  |              |  |                 |  |             |  |                    |  |                    |  |            |  |                      |  |
|                                                                                                                                                                                          |                                 |                  |              |  |                 |  |             |  |                    |  |                    |  |            |  |                      |  |



[illegible]

[illegible]
